# Supplementary material for: Promoting Recruitment using Information Management Efficiently (PRIME): a stepped-wedge, cluster randomised trial of a complex recruitment intervention embedded within the REstart or Stop Antithrombotics Randomised Trial
Source: Springer Nature journal article supplement (doi:10.1186/s13063-017-2355-z), 2017-12-01

## Appendix 2: Separate plots of each of the randomised groups of sites

Randomised site group 1

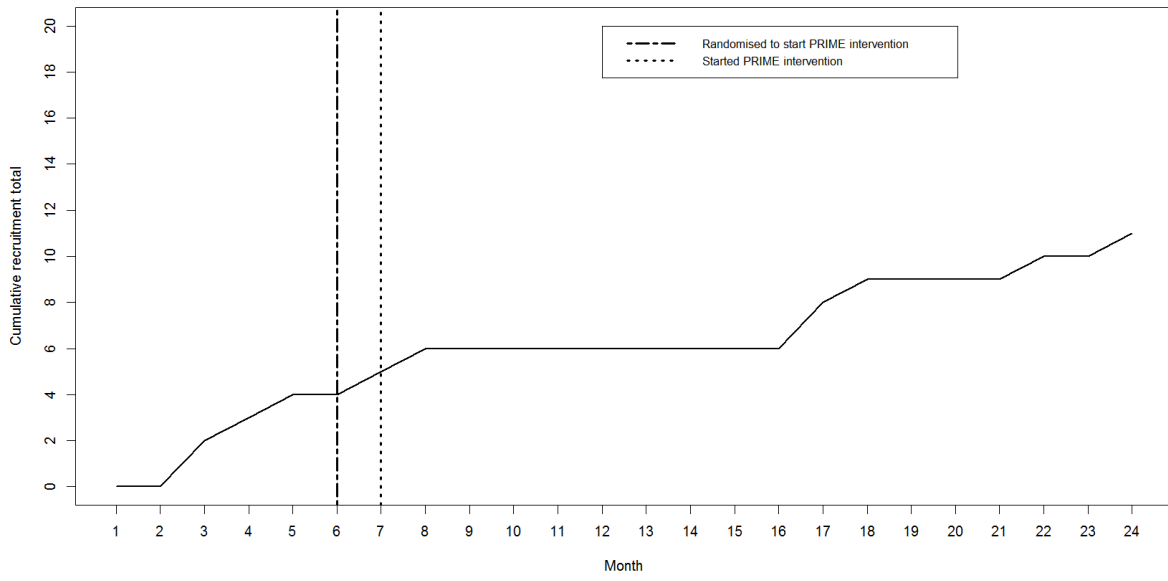

Randomised site group 2

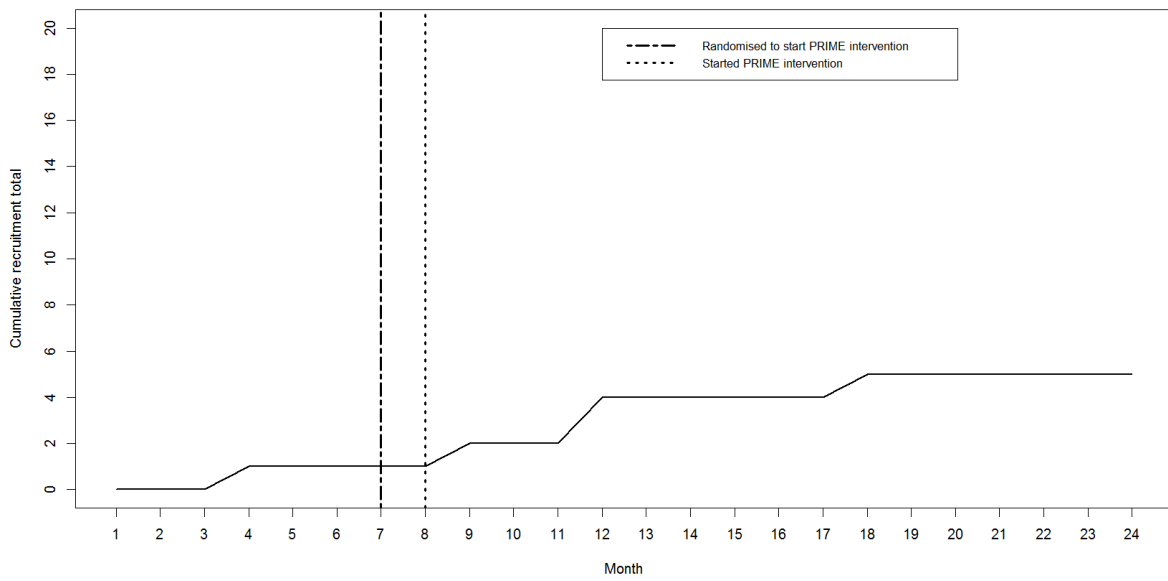

## Appendix 2: Separate plots of each of the randomised groups of sites

### Randomised site group 3

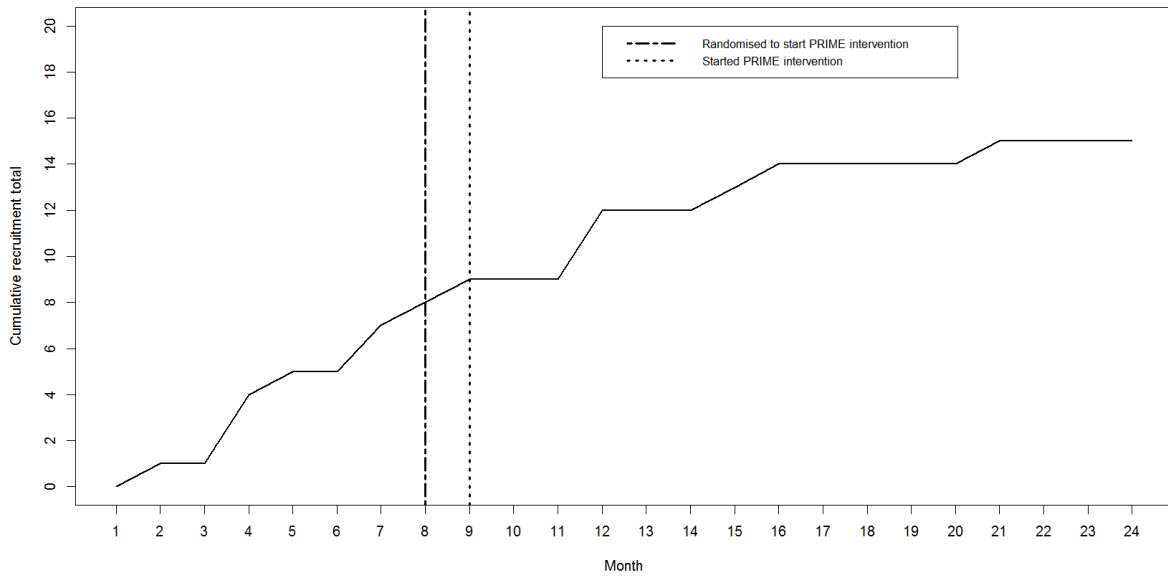

### Randomised site group 4

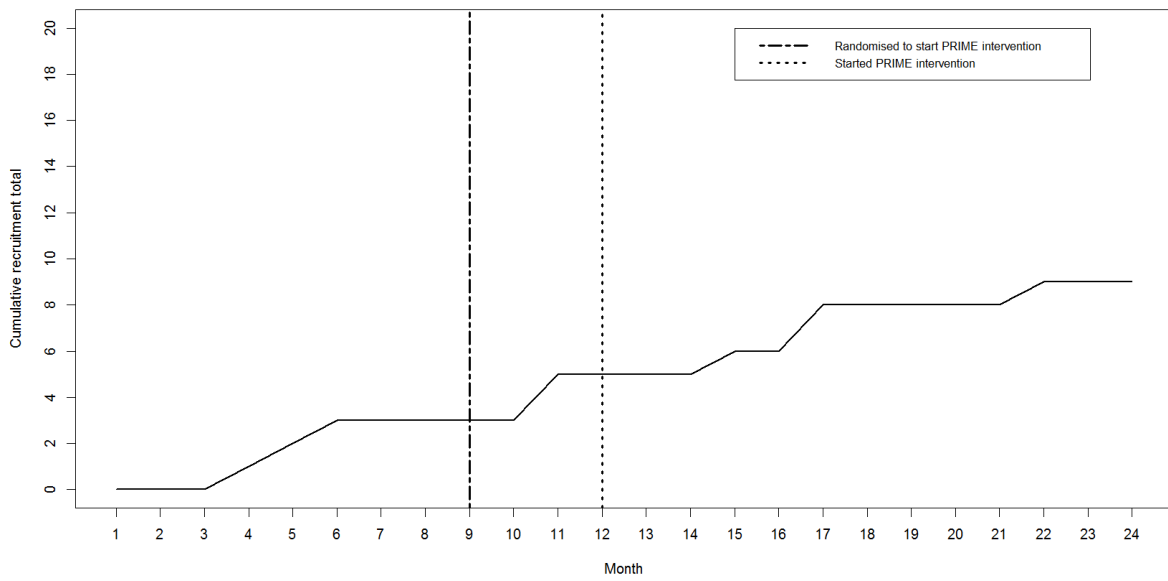

## Appendix 2: Separate plots of each of the randomised groups of sites

Randomised site group 5

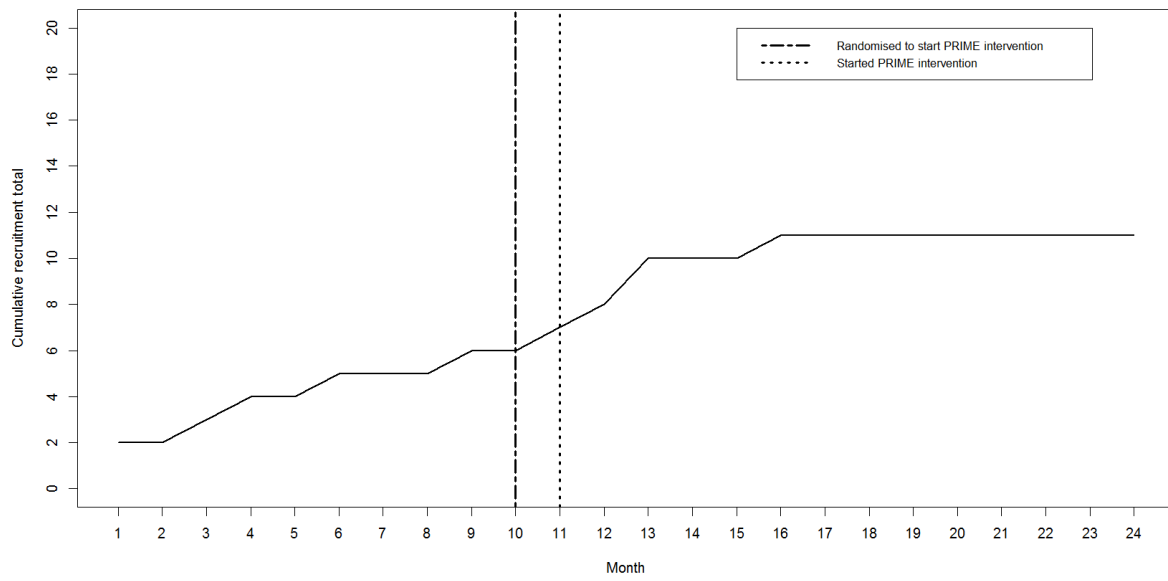

Randomised site group 6

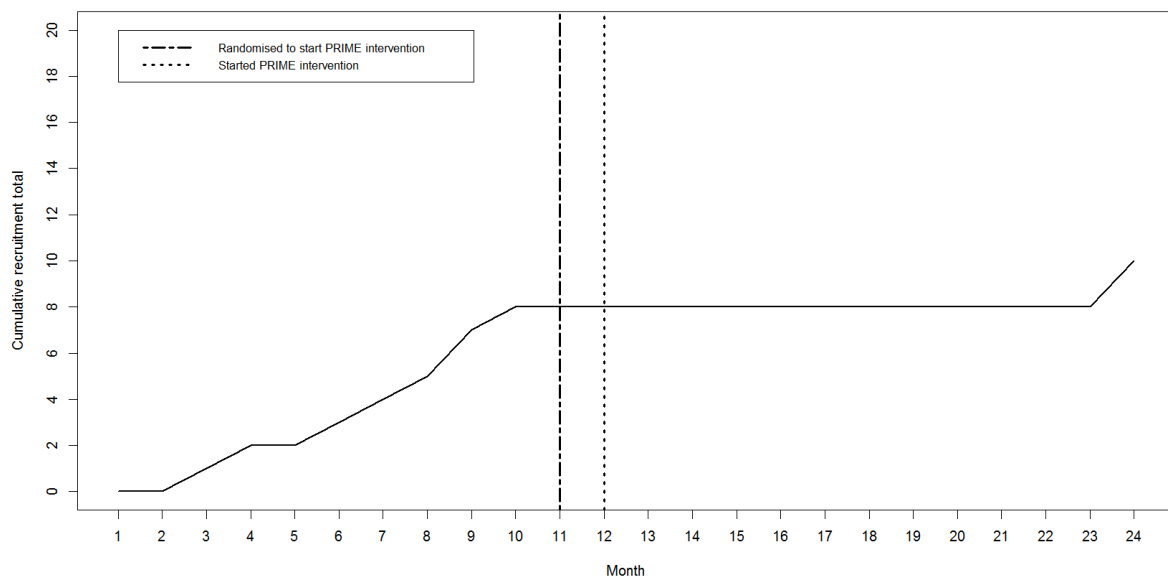

## Appendix 2: Separate plots of each of the randomised groups of sites

Randomised site group 7

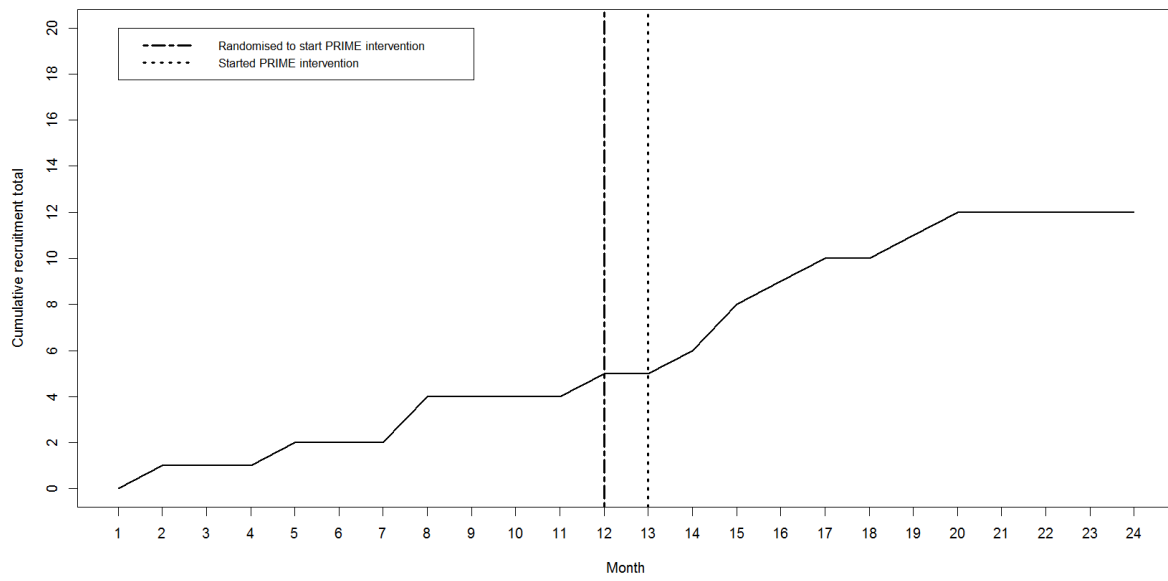

Randomised site group 8

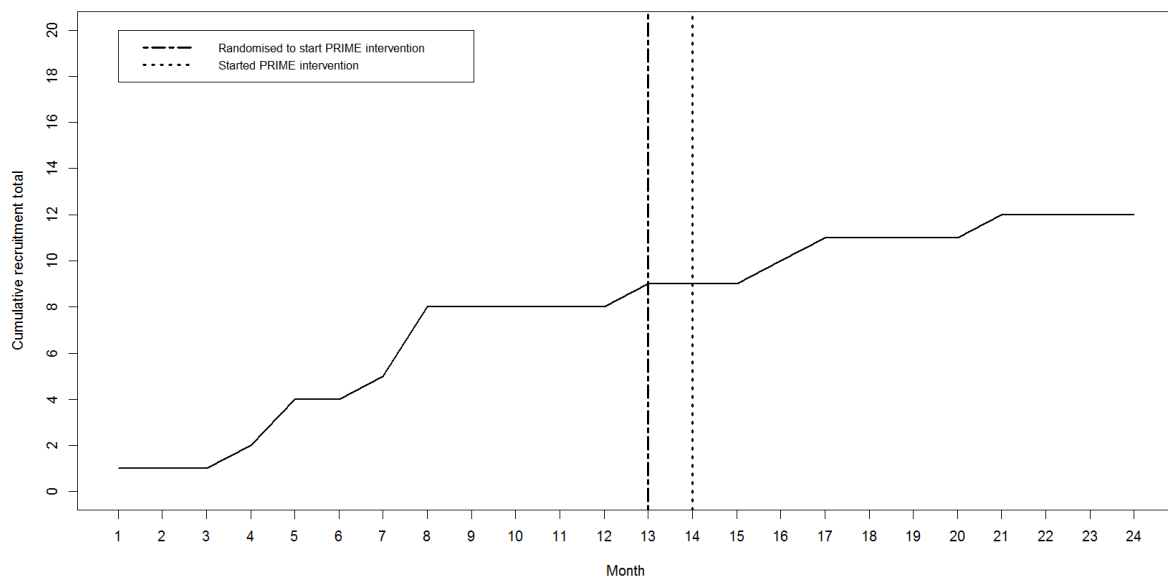

## Appendix 2: Separate plots of each of the randomised groups of sites

Randomised site group 9

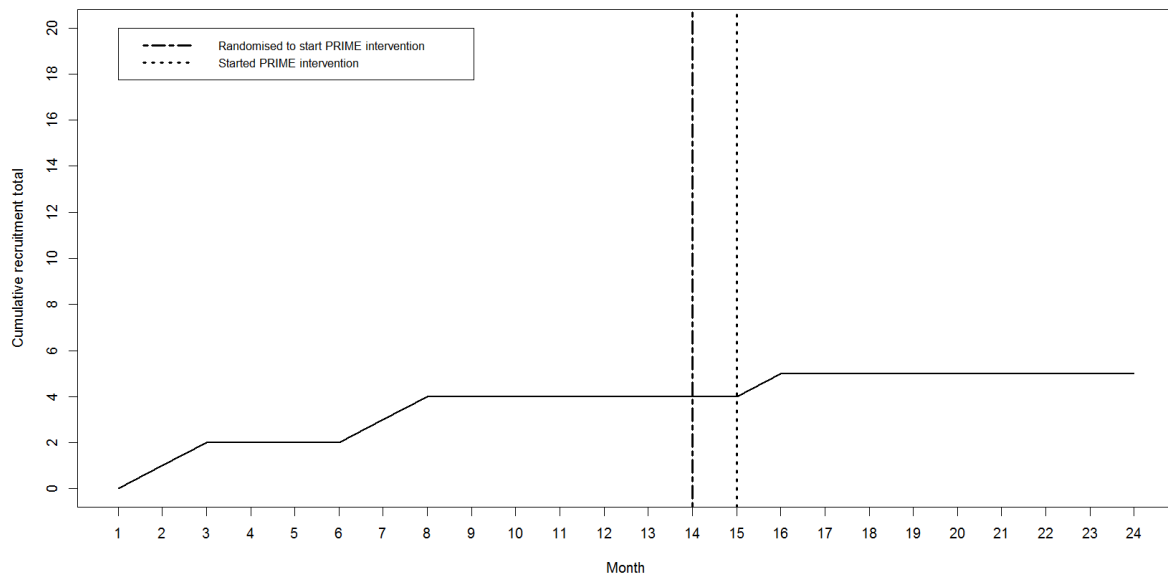

Randomised site group 10

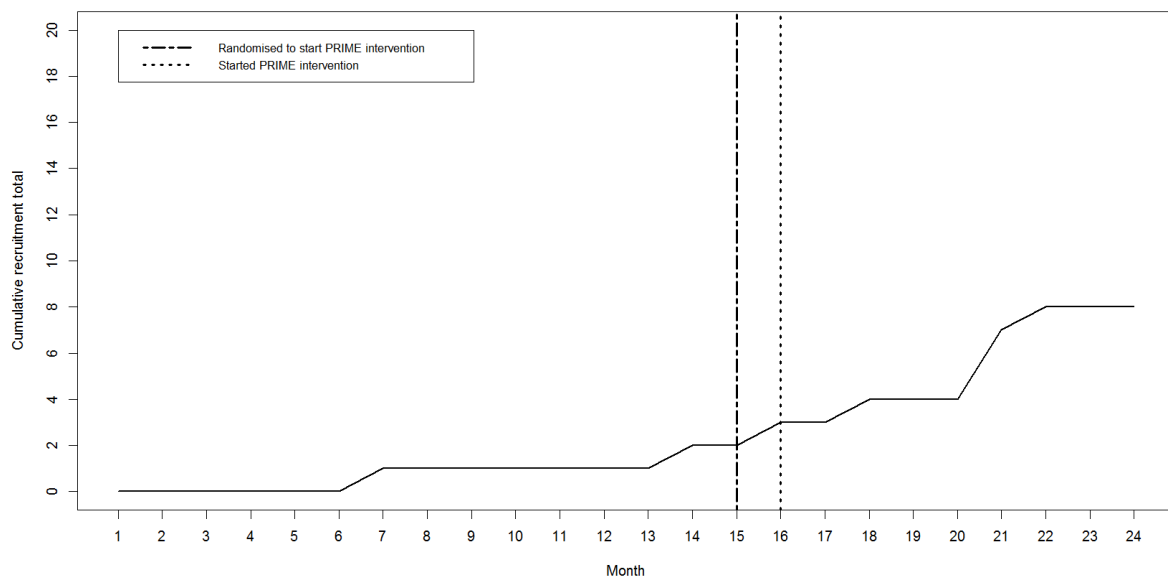

## Appendix 2: Separate plots of each of the randomised groups of sites

Randomised site group 11

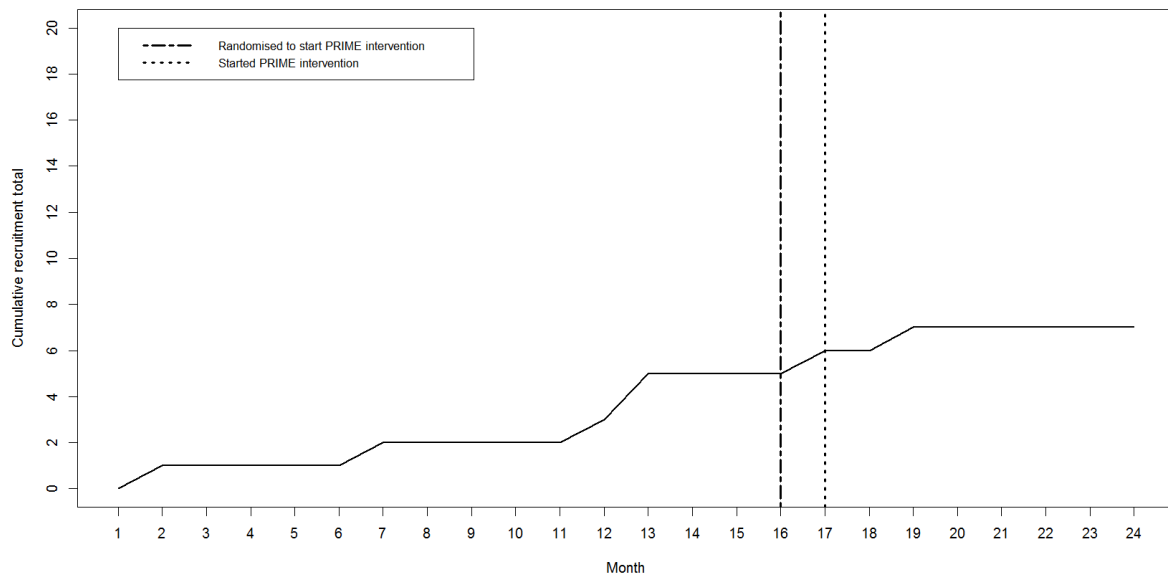

Randomised site group 12

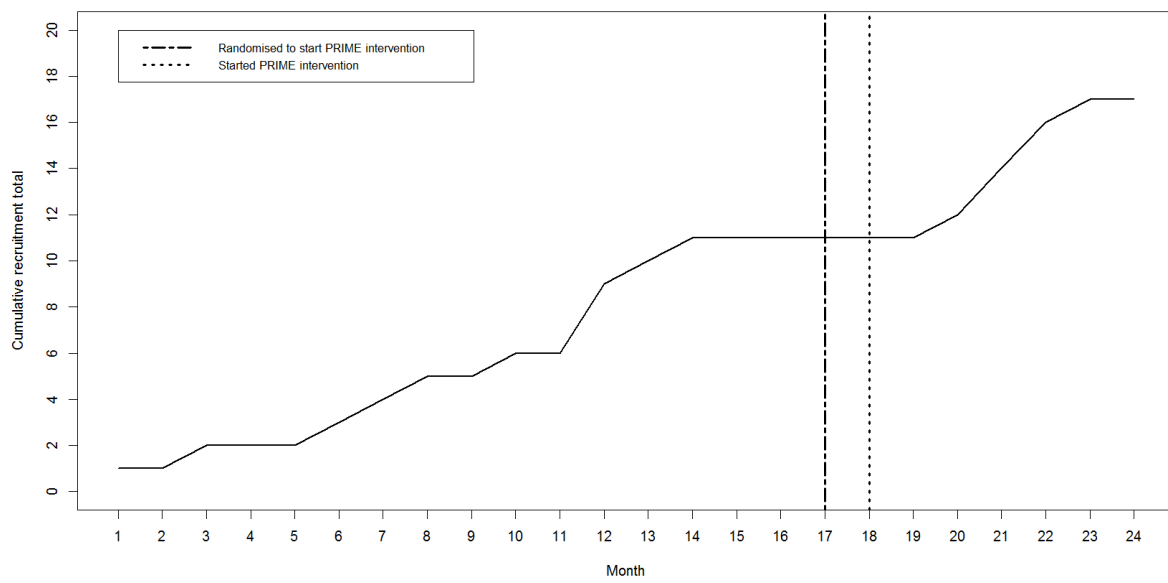

Supplement: MOESM2 [file 15331926]
