# Supplementary material for: Promoting Recruitment using Information Management Efficiently (PRIME): a stepped-wedge, cluster randomised trial of a complex recruitment intervention embedded within the REstart or Stop Antithrombotics Randomised Trial
Source: PubMed Central journal article supplement (PMC5745698; doi:10.1186/s13063-017-2355-z), 2017-12-28
Supplement: 13063_2017_2355_MOESM1_ESM.pdf [file 13063_2017_2355_MOESM1_ESM.pdf]

**Appendix 1 - Baseline site characteristics and responses to the pre-review questionnaire**

| <b>Month of PRIME intervention:</b>                                                                                                                     | <b>1</b> | <b>2</b> | <b>3</b> | <b>4</b> | <b>5</b> | <b>6</b> | <b>7</b> | <b>8</b> | <b>9</b> | <b>10</b> | <b>11</b> | <b>12</b> | <b>Overall</b> |
|---------------------------------------------------------------------------------------------------------------------------------------------------------|----------|----------|----------|----------|----------|----------|----------|----------|----------|-----------|-----------|-----------|----------------|
| Average number of patients randomised per month in 6 month period from March 15 to August 15                                                            |          |          |          |          |          |          |          |          |          |           |           |           |                |
| 0                                                                                                                                                       | 3        | 5        | 2        | 4        | 3        | 4        | 4        | 3        | 4        | 6         | 5         | 4         | 47 (65%)       |
| 0.17 (1/6)                                                                                                                                              | 2        | 1        | 3        | 1        | 2        | 1        | 2        | 2        | 2        | 0         | 1         | 1         | 18 (25%)       |
| 0.33 (2/6)                                                                                                                                              | 1        | 0        | 1        | 1        | 0        | 1        | 0        | 1        | 0        | 0         | 0         | 1         | 6 (8%)         |
| 0.50 (3/6)                                                                                                                                              | 0        | 0        | 0        | 0        | 1        | 0        | 0        | 0        | 0        | 0         | 0         | 0         | 1 (1%)         |
| Approx. proportion of In-Patients, who are suitable for follow-up, seen in clinic after hospital discharge (Q2 of Pre-recruitment review questionnaire) |          |          |          |          |          |          |          |          |          |           |           |           |                |
| 0%                                                                                                                                                      | 0        | 2        | 1        | 0        | 0        | 0        | 0        | 2        | 0        | 0         | 0         | 0         | 5 (12%)        |
| 10-30%                                                                                                                                                  | 2        | 0        | 0        | 1        | 0        | 1        | 0        | 0        | 0        | 1         | 0         | 0         | 5 (12%)        |
| 60-90%                                                                                                                                                  | 0        | 1        | 4        | 0        | 1        | 0        | 0        | 0        | 0        | 3         | 1         | 1         | 11 (26%)       |
| 100%                                                                                                                                                    | 2        | 0        | 0        | 2        | 2        | 2        | 4        | 2        | 3        | 0         | 3         | 2         | 22 (51%)       |

**Appendix 1 - Baseline site characteristics and responses to the pre-review questionnaire**

| <b>Month of PRIME intervention:</b>                                                                                                                                                          | <b>1</b> | <b>2</b> | <b>3</b> | <b>4</b> | <b>5</b> | <b>6</b> | <b>7</b> | <b>8</b> | <b>9</b> | <b>10</b> | <b>11</b> | <b>12</b> | <b>Overall</b> |
|----------------------------------------------------------------------------------------------------------------------------------------------------------------------------------------------|----------|----------|----------|----------|----------|----------|----------|----------|----------|-----------|-----------|-----------|----------------|
| Have you approached patients looked after by your stroke unit in the past to invite them back to clinic with a view to recruit them to RESTART? (Q3 of Pre-recruitment review questionnaire) |          |          |          |          |          |          |          |          |          |           |           |           |                |
| No                                                                                                                                                                                           | 1        | 4        | 1        | 3        | 0        | 1        | 1        | 3        | 3        | 0         | 3         | 0         | 20 (37%)       |
| Yes                                                                                                                                                                                          | 5        | 1        | 4        | 1        | 2        | 2        | 4        | 1        | 2        | 4         | 3         | 5         | 34 (63%)       |
| Have you used the template invitation letter to invite potential RESTART patients to clinic? (Q4 of Pre-recruitment review questionnaire)                                                    |          |          |          |          |          |          |          |          |          |           |           |           |                |
| No                                                                                                                                                                                           | 3        | 4        | 4        | 4        | 1        | 3        | 3        | 3        | 3        | 2         | 5         | 2         | 37 (62%)       |
| Yes                                                                                                                                                                                          | 3        | 1        | 2        | 0        | 3        | 1        | 2        | 2        | 2        | 3         | 1         | 3         | 23 (38%)       |

**Appendix 1 - Baseline site characteristics and responses to the pre-review questionnaire**

| <b>Month of PRIME intervention:</b>                                                                                         | <b>1</b> | <b>2</b> | <b>3</b> | <b>4</b> | <b>5</b> | <b>6</b> | <b>7</b> | <b>8</b> | <b>9</b> | <b>10</b> | <b>11</b> | <b>12</b> | <b>Overall</b> |
|-----------------------------------------------------------------------------------------------------------------------------|----------|----------|----------|----------|----------|----------|----------|----------|----------|-----------|-----------|-----------|----------------|
| Are your stroke audit data complete and accurate to the best of your knowledge (Q5 of Pre-recruitment review questionnaire) |          |          |          |          |          |          |          |          |          |           |           |           |                |
| No                                                                                                                          | 0        | 0        | 0        | 0        | 0        | 0        | 0        | 0        | 1        | 0         | 0         | 0         | 1 (2%)         |
| Yes                                                                                                                         | 6        | 5        | 6        | 4        | 3        | 4        | 5        | 5        | 4        | 4         | 6         | 5         | 57 (98%)       |
| Are you already routinely using the stroke audit data to recruit to RESTART? (Q7 of Pre-recruitment review questionnaire)   |          |          |          |          |          |          |          |          |          |           |           |           |                |
| No                                                                                                                          | 4        | 3        | 2        | 3        | 2        | 3        | 5        | 2        | 4        | 3         | 5         | 3         | 39 (68%)       |
| Yes                                                                                                                         | 2        | 2        | 4        | 1        | 1        | 1        | 0        | 2        | 1        | 1         | 1         | 2         | 18 (32%)       |

**Appendix 1 - Baseline site characteristics and responses to the pre-review questionnaire**

| <b>Month of PRIME intervention:</b>                                                                                                                                                     | <b>1</b> | <b>2</b> | <b>3</b> | <b>4</b> | <b>5</b> | <b>6</b> | <b>7</b> | <b>8</b> | <b>9</b> | <b>10</b> | <b>11</b> | <b>12</b> | <b>Overall</b> |
|-----------------------------------------------------------------------------------------------------------------------------------------------------------------------------------------|----------|----------|----------|----------|----------|----------|----------|----------|----------|-----------|-----------|-----------|----------------|
| What other sources of information do you have on patients which could be used to identify eligible RESTART patients? (Q8 of Pre-recruitment review questionnaire) [tick all that apply] |          |          |          |          |          |          |          |          |          |           |           |           |                |
| Screening logs                                                                                                                                                                          | 3        | 5        | 3        | 3        | 4        | 4        | 2        | 3        | 3        | 3         | 4         | 3         | 40 (71%)       |
| A database other than stroke audit                                                                                                                                                      | 1        | 0        | 1        | 0        | 1        | 1        | 0        | 1        | 1        | 1         | 0         | 0         | 7 (12%)        |
| Other                                                                                                                                                                                   | 0        | 3        | 3        | 0        | 0        | 0        | 3        | 1        | 3        | 1         | 3         | 2         | 19 (34%)       |
| No other information sources used (estimated based on number answering previous question but not this one)                                                                              | 2        | 0        | 0        | 1        | 0        | 0        | 1        | 0        | 0        | 0         | 1         | 1         | 6 (11%)        |
| Total number of sites in at least one of above four categories                                                                                                                          | 5        | 5        | 6        | 4        | 4        | 4        | 5        | 4        | 4        | 4         | 6         | 5         | 56 (100%)      |

**Appendix 1 - Baseline site characteristics and responses to the pre-review questionnaire**

| <b>Month of PRIME intervention:</b>                                                                                           | <b>1</b> | <b>2</b> | <b>3</b> | <b>4</b> | <b>5</b> | <b>6</b> | <b>7</b> | <b>8</b> | <b>9</b> | <b>10</b> | <b>11</b> | <b>12</b> | <b>Overall</b> |
|-------------------------------------------------------------------------------------------------------------------------------|----------|----------|----------|----------|----------|----------|----------|----------|----------|-----------|-----------|-----------|----------------|
| Have you used any other methods to boost recruitment (Q9 of Pre-recruitment review questionnaire)?                            |          |          |          |          |          |          |          |          |          |           |           |           |                |
| No                                                                                                                            | 2        | 1        | 2        | 1        | 0        | 4        | 1        | 3        | 2        | 3         | 2         | 1         | 22 (41%)       |
| Yes                                                                                                                           | 4        | 4        | 3        | 3        | 2        | 0        | 4        | 1        | 2        | 1         | 4         | 4         | 32 (59%)       |
| Have you found any barriers to finding suitable patients to recruit to RESTART? (Q10 of Pre-recruitment review questionnaire) |          |          |          |          |          |          |          |          |          |           |           |           |                |
| No                                                                                                                            | 1        | 1        | 0        | 0        | 0        | 2        | 0        | 2        | 0        | 2         | 0         | 0         | 8 (15%)        |
| Yes                                                                                                                           | 5        | 4        | 5        | 4        | 2        | 2        | 5        | 2        | 4        | 2         | 6         | 5         | 46 (85%)       |
