# Supplementary material for: Promoting Recruitment using Information Management Efficiently (PRIME): a stepped-wedge, cluster randomised trial of a complex recruitment intervention embedded within the REstart or Stop Antithrombotics Randomised Trial
Source: PubMed Central journal article supplement (PMC5745698; doi:10.1186/s13063-017-2355-z), 2017-12-28
Supplement: 13063_2017_2355_MOESM3_ESM.pdf [file 13063_2017_2355_MOESM3_ESM.pdf]

### Appendix 3: Sensitivity Analyses on the primary outcome

**Table S1** Negative-binomial GLMM results for an analysis of the primary outcome assuming an intervention-by-time interaction effect (N=1728, 72 sites)

| Variable                                             | Rate Ratio | 95% Confidence Interval | P-value |
|------------------------------------------------------|------------|-------------------------|---------|
| Intervention (Reference category: Control condition) | 1.04       | 0.54 to 2.00            | 0.901   |
| Time since start of study                            | 1.01       | 0.96 to 1.07            | 0.630   |
| December/January (Reference: any other month)        | 0.54       | 0.284 to 1.03           | 0.061   |
| Site location in Scotland (Reference: England/Wales) | 2.18       | 1.06 to 4.5             | 0.034   |
| Time since introduction of Recruitment Review        |            |                         |         |
| 3-6 months                                           | 0.92       | 0.46 to 1.81            | 0.799   |
| Over 6 months (Reference 0-3 months)                 | 0.392      | 0.183 to 0.84           | 0.016   |

**Table S2** Negative-binomial GLMM results for the **per-protocol analysis** of the primary outcome (using actual intervention timings) (N=1248, 52 sites)

| Variable                                             | Rate Ratio | 95% Confidence Interval | P-value |
|------------------------------------------------------|------------|-------------------------|---------|
| Intervention (Reference category: Control condition) | 1.01       | 0.50 to 2.04            | 0.981   |
| Time since start of study                            | 0.97       | 0.92 to 1.02            | 0.288   |
| December/January (Reference: any other month)        | 0.66       | 0.333 to 1.31           | 0.233   |
| Site location in Scotland (Reference: England/Wales) | 1.81       | 0.90 to 3.66            | 0.097   |

**Table S3** Negative-binomial GLMM results for the secondary analysis of the primary outcome excluding data from the pre- and post- rollout periods (N=792, 72 sites)

### Appendix 3: Sensitivity Analyses on the primary outcome

| Variable                                             | Rate Ratio | 95% Confidence Interval | P-value |
|------------------------------------------------------|------------|-------------------------|---------|
| Intervention (Reference category: Control condition) | 1.07       | 0.54 to 2.13            | 0.841   |
| Time since start of study                            | 0.94       | 0.86 to 1.04            | 0.246   |
| December/January (Reference: any other month)        | 0.340      | 0.133 to 0.87           | 0.024   |
| Site location in Scotland (Reference: England/Wales) | 1.89       | 0.84 to 4.3             | 0.126   |
| Average number randomised in first 6 months          | 18.2       | 2.00 to 166             | 0.010   |

**Table S4** Intervention effect results from Negative-binomial GLMMs of the primary outcome using different methods of specifying the time trend (N=1728, 72 sites)

| Method of specifying time trend                             | Intervention Effect Rate Ratio | Intervention Effect 95% Confidence Interval | P-value | AIC    |
|-------------------------------------------------------------|--------------------------------|---------------------------------------------|---------|--------|
| Continuous linear term                                      | 1.06                           | 0.55 to 2.03                                | 0.870   | 885.13 |
| Categorical time (categories are months)                    | 1.22                           | 0.63 to 2.34                                | 0.559   | 904.38 |
| Categorical time (categories in 5 monthly intervals)        | 1.00                           | 0.52 to 1.92                                | 0.989   | 889.92 |
| Spline function: B-spline of order 2 with no interior knots | 1.06                           | 0.58 to 1.92                                | 0.858   | 885.13 |
| Spline function: B-spline of order 3 with no interior knots | 1.04                           | 0.63 to 1.72                                | 0.870   | 885.20 |
| Spline function: B-spline of order 3 with 3 interior knots  | 1.21                           | 0.62 to 2.33                                | 0.578   | 889.22 |
| Spline function: B-spline of order 4 with 2 interior knots  | 1.20                           | 0.62 to 2.34                                | 0.582   | 890.03 |
| Spline function: B-spline of order 4 with 3 interior knots  | 1.21                           | 0.63 to 2.33                                | 0.574   | 890.16 |

AIC, Akaike Information Criterion
